# Supplementary material
Source: publisher figshare collection journal article supplement (https://frontiersin.figshare.com/ndownloader/files/21031242)
Supplement: Supplementary file [file 21031242]

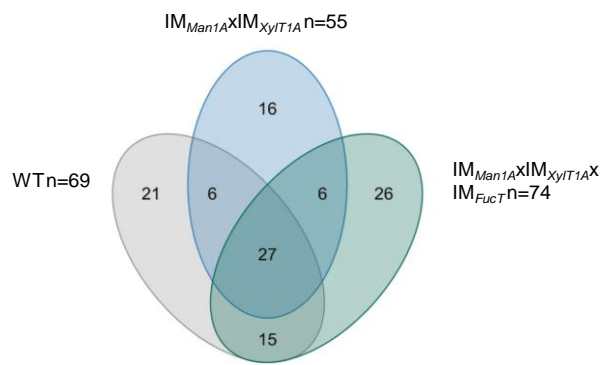

### Supplemental Figure 5. Analysis of $IM_{Man1A} \times IM_{XylT1A} \times IM_{FucT}$

Venn diagram for *N*-glycosites for which the *N*-glycan composition could be determined in WT,  $IM_{Man1A} \times IM_{XylT1A}$  and  $IM_{Man1A} \times IM_{XylT1A} \times IM_{FucT}$ .
